# Supplementary material for: Induction of supramolecular chirality in self-assembled nanofibers triggered by environmental change
Source: Royal Society of Chemistry journal article supplement (doi:10.1039/c1jm12683k), 2011-01-01
Supplement: c1jm12683k.pdf [file c1jm12683k.pdf]

Supporting Information

**Induction of Supramolecular Chirality in Self-Assembled Nanofibers Triggered by Environmental Change**

Zhegang Huang, Seong-Kyun Kang, and Myongsoo Lee\*

Center for Bio-responsive Assembly and Department of Chemistry, Seoul National  
University, Seoul 151-747, Korea.

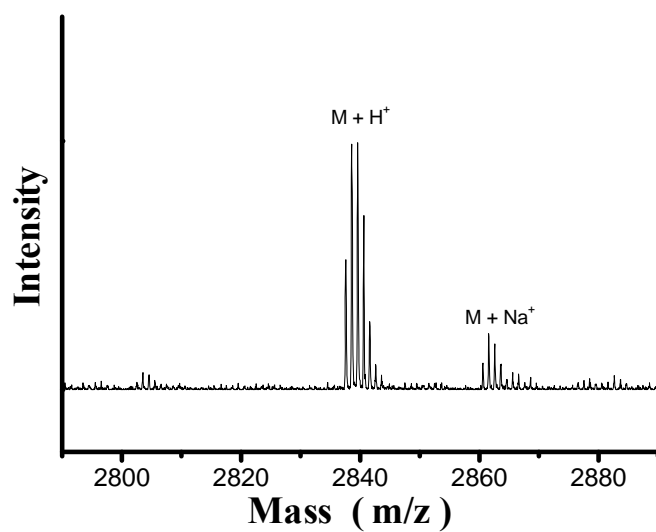

Fig. S1 MALDI-TOF mass spectra of molecule **1**.

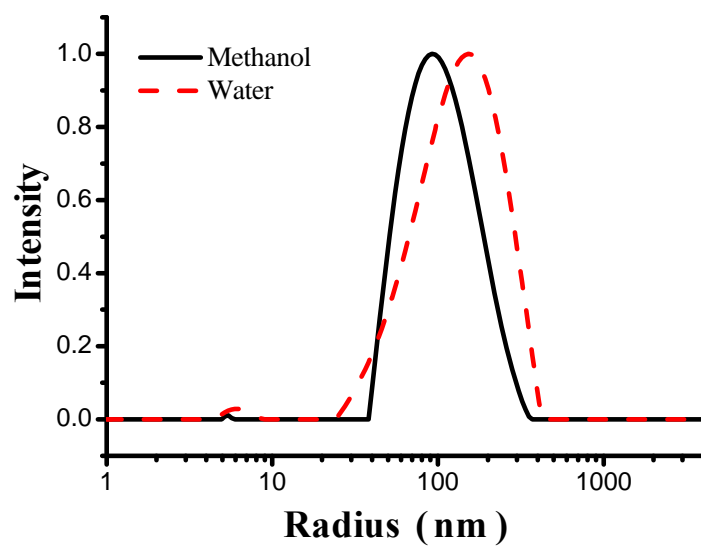

Fig. S2 Size distribution graphs of **1** in methanol ( $4 \times 10^{-4}$  M, black) and aqueous solution ( $4 \times 10^{-5}$  M, red).

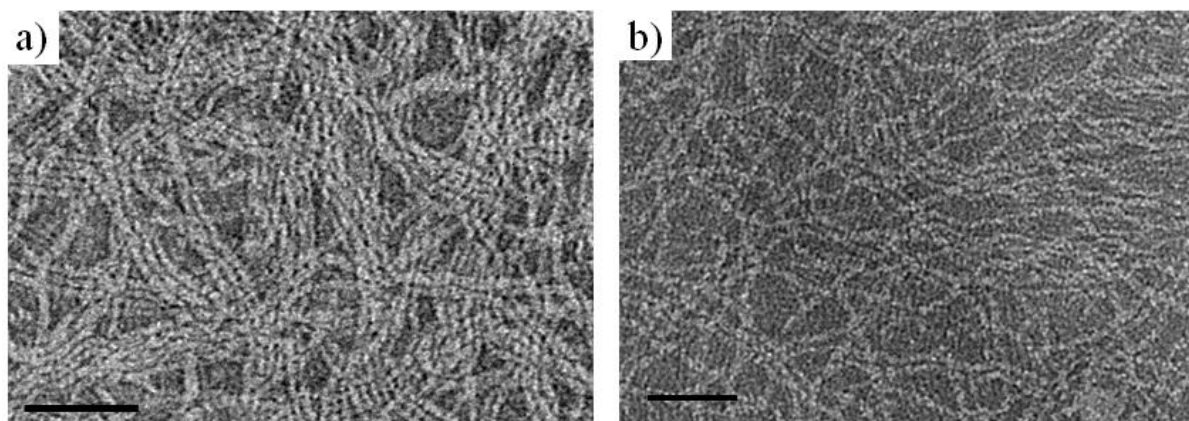

**Fig. S3** TEM images of **1** a) in Methanol-Water (3 : 2) solution ( $4 \times 10^{-4}$  M, scale bars: 50 nm). b) in aqueous solution ( $4 \times 10^{-5}$  M, scale bars: 100 nm).

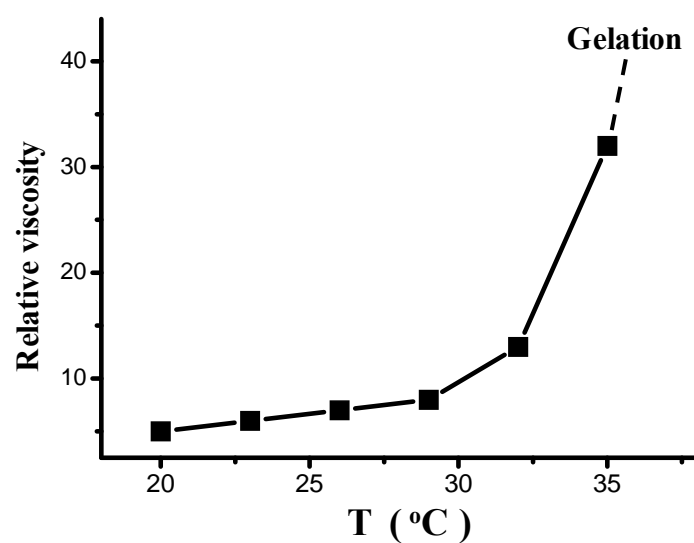

**Fig. S4** Relative viscosities of **1** in aqueous solution ( $1.5 \times 10^{-3}$  M) with increasing temperature.

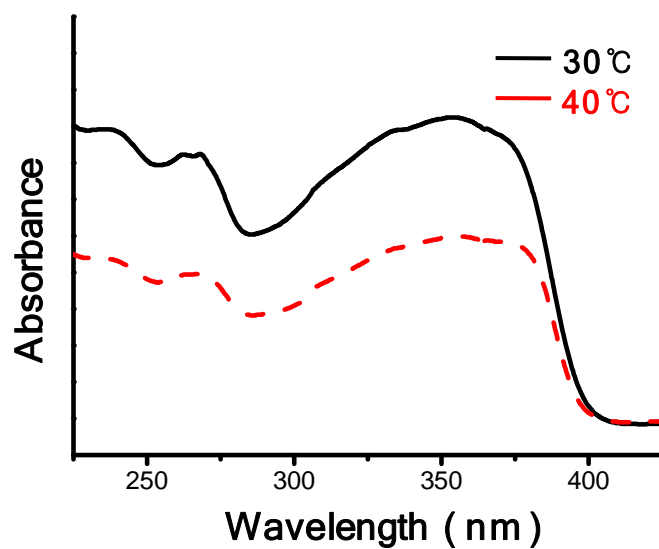

**Fig. S5** Absorption spectra of **1** in aqueous solution ( $1 \times 10^{-5}$  M) with increasing temperature.

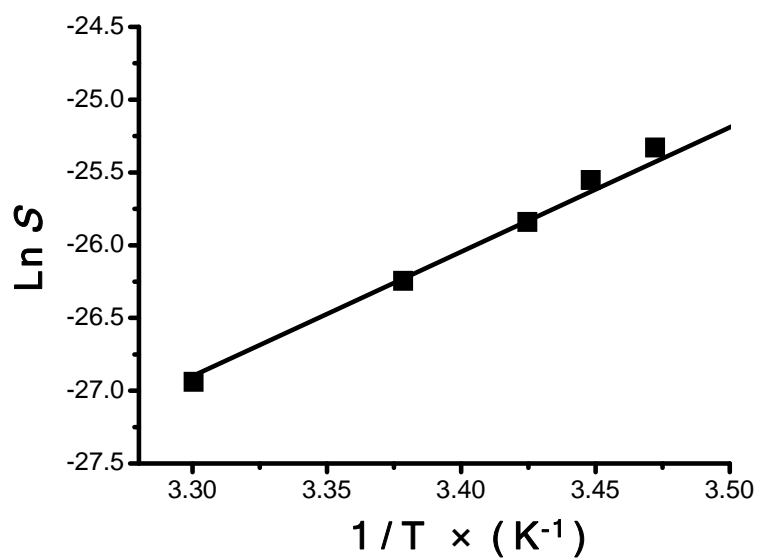

**Fig. S6** Plot of  $\ln S$  ( $S$  = solubility, the concentration of gelator species in solution) against the transition temperature from Sol to Gel for **1** in aqueous solution.

|          | $\Delta H^o$                 | $\Delta S^o$                                 |
|----------|------------------------------|----------------------------------------------|
| <b>1</b> | 71, ( KJ mol <sup>-1</sup> ) | 458, ( J mol <sup>-1</sup> K <sup>-1</sup> ) |

**Table S1** Thermodynamic parameters for crosslinking process based on the van't Hoff Plots.
